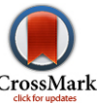

# Confirmation through Genetic Analysis of the Existence of Many Local Phyloclades of the Genus *Simocephalus* (Crustacea, Cladocera) in China

Xiaona Huang<sup>1,2\*</sup>, Xinlu Shi<sup>2</sup>, Alexey A. Kotov<sup>3</sup>, Fukang Gu<sup>1</sup>

**1** School of Life Science, East China Normal University, Shanghai, China, **2** Hangzhou Key Laboratory for Animal Adaptation and Evolution, Hangzhou Normal University, Hangzhou, China, **3** A.N. Severtsov Institute of Ecology and Evolution, Leninsky Prospect 33, Moscow, Russia

## Abstract

Previously, a series of *Simocephalus* taxa (Cladocera: Daphniidae) from China were described. Most were proposed to be junior synonyms in the last revision of the genus. Using original material from China and data from GenBank, we investigate the biodiversity and phylogeny of *Simocephalus* using sequences of the cytochrome *c* oxidase subunit I (COI) and the nuclear 18S genes. In both cases, neighbor-joining, maximum likelihood and Bayesian inference analyses led to highly congruent tree topologies. The grouping of the deeper clades agrees with the inter-generic classification of Orlova-Bienkowskaja (2001). Only the populations of *S. serrulatus* from Eurasia and North America seem to be closely related, and there are no other shared species between the two continents. Our study unambiguously confirms the existence of many lineages from the subgenera of *Simocephalus* (*Echinocaudus*) and *Simocephalus* s.str. in China, but their morphology needs to be reexamined by taking a wider range of characters (e.g., of female thoracic limbs and adult males) into consideration.

**Citation:** Huang X, Shi X, Kotov AA, Gu F (2014) Confirmation through Genetic Analysis of the Existence of Many Local Phyloclades of the Genus *Simocephalus* (Crustacea, Cladocera) in China. PLoS ONE 9(11): e112808. doi:10.1371/journal.pone.0112808

**Editor:** Donald James Colgan, Australian Museum, Australia

**Received:** June 15, 2014; **Accepted:** October 20, 2014; **Published:** November 13, 2014

**Copyright:** © 2014 Huang et al. This is an open-access article distributed under the terms of the Creative Commons Attribution License, which permits unrestricted use, distribution, and reproduction in any medium, provided the original author and source are credited.

**Data Availability:** The authors confirm that all data underlying the findings are fully available without restriction. All relevant data are within the paper.

**Funding:** The reagents, materials and analysis tools of this study was partly supported by the National Natural Science Foundation of China (Grant Nos. 31071880 and 31272262), Zhejiang Provincial Natural Science Foundation and Zhejiang Key Scientific & Technological Innovation Team Project (Grant Nos. 2010R50039-20), and Hangzhou Key Laboratory for Animal Adaptation and Evolution (Grant No. 20100333T05) and part of analysis tools of this study was partly supported by Russian foundation for Basic research (grants 12-04-00207-a and 14-04-01149-a). The funders had no role in study design, data collection and analysis, decision to publish, or preparation of the manuscript.

**Competing Interests:** The authors have declared that no competing interests exist.

\* Email: nxiaona@163.com

## Introduction

Cladocera (Crustacea: Branchiopoda) is an important group of micro-crustaceans predominantly inhabiting continental water bodies of different, if not all, types [1]. Among the most famous peculiarities of these animals are their sexually produced diapausing eggs, which are resistant to desiccation and other unfavourable conditions and are important propagules for passive dispersal by different modes, i.e. by birds [1], [2]. Their strong ability to survive passive dispersal was one reason why cladoceran species' distributions were for a long time accepted as cosmopolitan, but since the 1970's this concept has changed radically to the so-called non-cosmopolitanism, or "continental endemism" [3], [4], [5], [6]. The correctness of this idea is now confirmed for some genera and species groups [6], [7], [8], [9], although the real diversity and distribution of taxa in other groups needs to be accurately studied.

Some cladocerans, such as species of the genus *Simocephalus* Schödler, 1858 (family Daphniidae Straus, 1820), are used as environmental indicators and "standard" test objects in toxicological studies [10], [11]. Representatives of this genus are very common in vegetation, the open littoral zones of ponds and lakes, the semi-static affluents of rivers and pools and puddles of various types. Based on morphological characters, Orlova-Bienkowskaja [9] recognized 20 valid species in this genus belonging to five

subgenera: *Simocephalus* s. str., *Simocephalus* (*Coroncephalus*), *Simocephalus* (*Acutirostratus*), *Simocephalus* (*Echinocaudus*), and *Simocephalus* (*Aquipiculus*). Many of the taxa were regarded by Orlova-Bienkowskaja [9] as junior synonyms of species described earlier.

Several species of *Simocephalus* were identified and then re-described by Chinese authors [12], [13], [14], [15], [16], [17], [18]. Only *Simocephalus heilongjiangensis* Shi & Shi, 1994, which is widely distributed in the tropics, was regarded as a valid species by Orlova-Bienkowskaja [9]. Among the taxa synonymized by Orlova-Bienkowskaja [9], there were several, earlier-described species from China, such as *S. himalayensis* Chiang & Chen, 1974 and *S. beianensis* Shi & Shi, 1994. In addition, *S. himalayensis microdus* Chen, Shi & Shi, 1992 was not discussed by Orlova-Bienkowskaja [9], and its taxonomic status remains unclear. Therefore, there is a conflict that needs to be resolved in the understanding of the taxonomy of the genus between Western investigators, who mainly follow Orlova-Bienkowskaja [9], and Chinese researchers.

Near the end of the 20<sup>th</sup> century, a powerful new tool for testing taxonomic hypotheses, molecular phylogenetics, became available. In cladocerans, it was mainly applied to species of different *Daphnia* groups [5], [19]. However, molecular phylogenetic studies were subsequently conducted for some other genera and families of the cladocerans [6], [20], [21], [22].

**Table 1.** The catalogue numbers and the collection location of the specimens from the Hydrobiology Laboratory at Hangzhou Normal University (HZNU), Zhejiang province, People's Republic of China.

| Species                                                      | Locality                                                        | Latitude, longitude, and altitude | GenBank accession numbers for COI      | GenBank accession numbers for 18S | Collection catalog numbers |
|--------------------------------------------------------------|-----------------------------------------------------------------|-----------------------------------|----------------------------------------|-----------------------------------|----------------------------|
| <i>Simocephalus cf. vetulus</i>                              | Tongzigou, Muleng, Heilongjiang province, China                 | N44°23.119', E130°27.464', 516 m  | KF960106, KF960107, KF960109, KF960110 | –                                 | YN2011080302               |
| <i>Simocephalus cf. vetulus</i>                              | Shangshan village, Fuyang, Zhejiang province, China             | N30°07.599', E119°46.746', 98 m   | KF960108                               | KJ775008                          | YN2009040508               |
| <i>Simocephalus cf. vetulus</i>                              | Boyang lake in Jiangxi province, China                          | N28°57.402', E117°05.608'         | KF960103- KF960105                     | –                                 | YN2010103002               |
| <i>Simocephalus beianensis</i>                               | Near the railway station of Beian, Heilongjiang province, China | N48°13.730', E126°29.123'         | KF960093- KF960097                     | KJ775010                          | YN2013082905               |
| <i>Simocephalus vetuloides</i>                               | Shangshan village, Fuyang, Zhejiang province, China             | N30°07.599', E119°46.746', 98 m   | KF960098                               | KJ775013                          | YN2009040505               |
| <i>Simocephalus vetuloides</i>                               | Tongzigou, Muleng, Heilongjiang province, China                 | N44°23.119', E130°27.464', 516 m  | KF960099                               | –                                 | YN2011080301               |
| <i>Simocephalus himalayensis</i>                             | The wetland in plateau from Xizang, China                       | N30°42.442', E090°53.284', 4746 m | KF960070- KF960078                     | KJ775015                          | YN20130617                 |
| <i>Simocephalus cf. congener</i>                             | Sognsvan Lake, Norway                                           | N59°97.088', E10°73.109'          | KF960053- KF960058                     | KJ775017                          | YN2012080501               |
| <i>Simocephalus himalayensis microdus</i>                    | Longhe farm in Heilongjiang province, China                     | N53°20.322', E123°58.347', 376 m  | KF960059- KF960063                     | KJ775022                          | YN2013082802               |
| <i>Simocephalus himalayensis microdus</i>                    | Harbin Normal University, Heilongjiang province, China          | N45°33.597', E126°41.249', 98 m   | KF960064- KF960069                     | –                                 | YN2009100401               |
| <i>S. sp. = Simocephalus serrulatus</i> in Young et al. 2012 | Shangshan village, Fuyang, Zhejiang province, China             | N 30°00.038', E 119°45.731', 43 m | –                                      | KJ775022                          | YN2009040510               |
| <i>Simocephalus sibiricus</i>                                | Boyang lake, Jiangxi province, China.                           | N28°57.402', E117°05.608'         | KF960086- KF960088                     | –                                 | YN2010103004               |
| <i>Simocephalus sibiricus</i>                                | Qilin mountain, Jiangxi province, China                         | N29°05.280', E116°45.333'         | KF960079- KF960082, KF960089           | –                                 | YN201010300805             |
| <i>Simocephalus sibiricus</i>                                | Haining of Zhejiang province, China                             | N30°25.816', E120°26.776'         | KF960083- KF960085                     | KJ775025                          | YN2012051201               |
| <i>Simocephalus heilongjiangensis</i>                        | Linhai reservoir in Heilongjiang province, China                | N45°34.008', E126°48.081', 8 m    | KF960090- KF960092                     | KJ775026                          | YN2011080701               |
| <i>Simocephalus serrulatus</i>                               | Longhe farm in Heilongjiang province, China                     | N53°16.961', E123°39.251', 267 m  | KF960100- KF960101                     | –                                 | YN2013082801               |
| <i>Simocephalus serrulatus</i>                               | Zhoushan in Zhejiang province, China                            | N29°56.666', E122°24.406', 2 m    | KF960102                               | KJ775028                          | YN20100606                 |
| <i>Daphnia cf. similoides</i>                                | Longhe farm in Heilongjiang province, China                     | N53°16'.961', E123°39.251', 267 m | KF960111                               | –                                 | YN2013082802               |
| <i>Daphnia cf. magna</i>                                     | Wetland in plateau, Xizang, China                               | N30°42.442', E090°53.284', 4746 m | –                                      | KJ775029                          | YN2013061703               |
| <i>Daphnia pulex</i>                                         | Yuhang, Hangzhou, Zhejiang province, China                      | N30°25.161', E120°15.666'         | –                                      | KJ775030                          | YN2009102402               |

N indicates the North latitude, and E indicates East longitude.  
doi:10.1371/journal.pone.0112808.t001

COI barcoding studies for the *Simocephalus* genus were started by Elias-Gutiérrez et al. [23]. These authors recognized eight taxa in tropical Mexico and Guatemala, including two species that are habitually similar to *S. mixtus*, two species habitually similar to *S. exspinosus*, and two species similar to *S. punctatus*. Then, Jeffrey et al. [24] detected six species in Arctic Canada including two different clades of “*S. cf. serrulatus*” and four clades of “*S. cf. punctatus*”. Young et al. [25], in contrast, found that all of the

populations from Taiwan classified as *S. vetulus*, *S. vetuloides* and *S. mixtus* actually belonged to a single species, which compromises the taxonomy according to Orlova-Bienkowskaja [9].

The aim of this paper was to investigate the biodiversity and phylogeny of *Simocephalus* in China using the sequences of cytochrome *c* oxidase subunit I (COI) and nuclear 18S genes.

## Materials and Methods

### Sampling and diagnosis

Specimens were preserved in absolute ethanol (100%) or were brought to the laboratory alive. They were initially examined using a Leica DM 6000 B Digital-Microscope (Germany) with a CTR6000 electric cabinet, Leica LAS software, and Leica DFC 495 CCD. The determination was first made by following Orlova-Bienkowskaja [9]. However, populations were then differentiated according to their morphological characters as proposed in the Chinese literature [13], [16], [17], [18]. The specimens from the studied populations were deposited in the collection of the Hydrobiology Laboratory in Hangzhou Normal University (HZNU), Zhejiang province, People's Republic of China (Table 1).

### DNA extraction, amplification, and sequencing

Genomic DNA was extracted using a REDEExtract-N-Amp Tissue Polymerase Chain Reaction (PCR) Kit (Sigma, St. Louis, MO, USA) according to the manufacturer's instructions [26]. The mitochondrial COI gene was amplified using the LCO1490 and HCO2198 primers [27]. The nuclear 18S rRNA gene was amplified using the 18 s-F: 5'-AACCTGGTTGATCCTGC-CAGT-3' and 18 s-R: 5'-TGATCCTTCTGCAGGTTCCACC-TAC-3' primers from Medlin et al. [28].

The 25- $\mu$ l PCR reaction consisted of 2  $\mu$ l of genomic DNA, 8.5  $\mu$ l of double-distilled H<sub>2</sub>O, 1  $\mu$ l of each primer (10 mM) and 2 $\times$  Taq PCR Master Mix (12.5  $\mu$ l). The thermal conditions used to amplify the COI gene included an initial denaturing step of 5 min at 94°C, 35 cycles of 30 seconds at 94°C, 45 seconds at 51°C, 50 seconds at 72°C, and a final extension of 72°C for 7 min. The thermal conditions used to amplify the 18S gene consisted of

two cycles of 30 seconds at 94°C, 45 seconds at 60°C, and 45 seconds at 72°C; five cycles of 30 seconds at 93°C, 45 seconds at 55°C, and 45 seconds at 72°C; followed by 35 cycles of 30 seconds at 93°C, 30 seconds at 50°C, and 3 min at 72°C.

The PCR products were gel-purified and sequenced on an ABI 3730x1 sequencer using both the forward and reverse primers. The HZNU collection sequences comprised *S. vetulus*, *S. vetuloides*, *S. beianensis*, *S. serrulatus*, *S. heilongjiangensis*, *S. himalayensis microdus*, *S. sibiricus*, and *S. himalayensis* from China, *S. cf. congener* from Norway, *S. sp.* ("*S. serrulatus*" in Young et al. [25]) from Hangzhou province in China, and *Daphnia cf. similoides* from China (Table 1). The nucleotide sequences of the newly analysed specimens were deposited in GenBank database (Table 1).

### Alignment and phylogenetic analyses

We downloaded the available COI sequences from previous studies (*S. congener*, *S. punctatus*, *S. cf. punctatus*, *S. vetulus*, *S. cf. vetulus*, *S. mixtus*, *S. cf. mixtus*, *S. exspinosus*, *S. cf. exspinosu*, *S. serrulatus*, *S. heilongjiangensis* and *Simocephalus sp.*) from GenBank (Table 2) and aligned them with our sequences. *Diaphanosoma dubium* (AB549201) and *Daphnia cf. similoides* (KF960111) were used as outgroups. The 18S sequences were obtained from the samples in the HZNU laboratory, and *Daphnia cf. magna* (KJ775029) and *Daphnia pulex* (KJ775030) were used as outgroups.

The alignment was created using ClustalW [32] and manually edited. The nucleotide composition, conserved sites, variable sites, parsimony-informative sites, transition/transversion ratio, and average genetic distances between each pair of species were determined using MEGA 5.1 [33]. A 658-bp COI fragment and

**Table 2.** The COI sequences from GenBank that were used in our study.

| Species                               | Genebank accession number                                     | Collection location  | Reference                   |
|---------------------------------------|---------------------------------------------------------------|----------------------|-----------------------------|
| <i>Simocephalus cf. vetulus</i>       | AB549187–AB549193                                             | Taiwan               | Young et al. [25]           |
| <i>Simocephalus vetulus</i>           | KF484582, KF484596, KF484623, and KF484616                    | Slovakia             | Kohout et al. [29]          |
| <i>Simocephalus cf. punctatus</i> 1   | JN233983, JN233988, JN233989, JN233992, and JN233994–JN234003 | Canada               | Jeffery et al. [24]         |
| <i>Simocephalus cf. punctatus</i> 1   | EU702306–EU702311                                             | Mexico and Guatemala | Elías-Gutiérrez et al. [23] |
| <i>Simocephalus cf. vetulus</i>       | DQ889172                                                      | United Kingdom       | Costa et al. [30]           |
| <i>Simocephalus cf. punctatus</i> 2   | JN233976                                                      | Canada               | Jeffery et al. [24]         |
| <i>Simocephalus sp.</i>               | KC617418, KC617179, and KC617180                              | Mexico               | Prosser et al. [31]         |
| <i>Simocephalus cf. mixtus</i> 1      | EU702297–EU702301, EU702304, and EU702305                     | Mexico               | Elías-Gutiérrez et al. [23] |
| <i>Simocephalus cf. mixtus</i> 2      | EU702281                                                      | Mexico               | Elías-Gutiérrez et al. [23] |
| <i>Simocephalus exspinosus</i>        | KF484668 and KF484655                                         | Slovakia             | Kohout et al. [29]          |
| <i>Simocephalus congener</i>          | KF484641 and KF484650                                         | Slovakia             | Kohout et al. [29]          |
| <i>Simocephalus serrulatus</i>        | AB549197 and AB549198                                         | Taiwan               | Young et al. [25]           |
| <i>Simocephalus cf. exspinosus</i> 1  | EU702287 and EU702290–EU702296                                | Mexico               | Elías-Gutiérrez et al. [23] |
| <i>Simocephalus cf. exspinosus</i> 1  | KC617164                                                      | Mexico               | Prosser et al. [31]         |
| <i>Simocephalus cf. exspinosus</i> 2  | EU702279                                                      | Mexico               | Elías-Gutiérrez et al. [23] |
| <i>Simocephalus heilongjiangensis</i> | AB549194–AB549196                                             | Taiwan               | Young et al. [25]           |
| <i>Simocephalus serrulatus</i>        | KF484625, and KF484628- KF484630                              | Slovakia             | Kohout et al. [29]          |
| <i>Simocephalus serrulatus</i>        | JN234006 and JN234007                                         | Canada               | Jeffery et al. [24]         |
| <i>Simocephalus serrulatus</i>        | KC617416 and KC617417                                         | Mexico               | Prosser et al. [31]         |
| <i>Simocephalus serrulatus</i>        | EU702312                                                      | Mexico and Guatemala | Elías-Gutiérrez et al. [23] |
| <i>Diaphanosoma dubium</i>            | AB549201                                                      | Taiwan               | Young et al. [25]           |

doi:10.1371/journal.pone.0112808.t002

**Table 3.** The genetic distances (Dxy) between groups of the genus *Simocephalus* based on the COI gene.

| Intra-group | Inter-group |       |       |       |       |       |       |       |       |       |       |       |       |       |       |       |       |       |       |       |       |       |       |
|-------------|-------------|-------|-------|-------|-------|-------|-------|-------|-------|-------|-------|-------|-------|-------|-------|-------|-------|-------|-------|-------|-------|-------|-------|
|             | 1           | 2     | 3     | 4     | 5     | 6     | 7     | 8     | 9     | 10    | 11    | 12    | 13    | 14    | 15    | 16    | 17    | 18    | 19    | 20    | Dxy   | SD    |       |
| 1           | 0.018       | 0.017 | 0.017 | 0.019 | 0.018 | 0.018 | 0.018 | 0.019 | 0.018 | 0.018 | 0.021 | 0.020 | 0.019 | 0.019 | 0.019 | 0.019 | 0.021 | 0.021 | 0.021 | 0.021 | 0.025 | 0.008 | 0.003 |
| 2           | 0.163       | 0.017 | 0.018 | 0.018 | 0.011 | 0.016 | 0.017 | 0.019 | 0.018 | 0.018 | 0.021 | 0.020 | 0.019 | 0.020 | 0.021 | 0.020 | 0.020 | 0.020 | 0.022 | 0.020 | 0.027 | 0.007 | 0.003 |
| 3           | 0.158       | 0.146 | 0.016 | 0.016 | 0.016 | 0.016 | 0.012 | 0.017 | 0.018 | 0.018 | 0.018 | 0.018 | 0.019 | 0.019 | 0.020 | 0.019 | 0.018 | 0.021 | 0.019 | 0.025 | –     | –     | –     |
| 4           | 0.160       | 0.146 | 0.138 | 0.017 | 0.018 | 0.018 | 0.016 | 0.018 | 0.020 | 0.019 | 0.021 | 0.021 | 0.020 | 0.021 | 0.020 | 0.021 | 0.019 | 0.020 | 0.019 | 0.023 | 0.000 | 0.000 | 0.000 |
| 5           | 0.159       | 0.070 | 0.132 | 0.137 | 0.016 | 0.015 | 0.017 | 0.017 | 0.018 | 0.019 | 0.017 | 0.020 | 0.019 | 0.019 | 0.020 | 0.020 | 0.020 | 0.020 | 0.021 | 0.018 | 0.024 | 0.000 | 0.000 |
| 6           | 0.160       | 0.139 | 0.127 | 0.161 | 0.132 | 0.016 | 0.018 | 0.018 | 0.018 | 0.019 | 0.019 | 0.019 | 0.020 | 0.020 | 0.020 | 0.020 | 0.019 | 0.020 | 0.020 | 0.020 | 0.024 | 0.000 | 0.000 |
| 7           | 0.161       | 0.143 | 0.075 | 0.136 | 0.134 | 0.135 | 0.018 | 0.018 | 0.018 | 0.017 | 0.018 | 0.018 | 0.017 | 0.020 | 0.020 | 0.018 | 0.019 | 0.022 | 0.019 | 0.025 | 0.025 | 0.025 | 0.005 |
| 8           | 0.182       | 0.169 | 0.152 | 0.165 | 0.143 | 0.169 | 0.161 | 0.017 | 0.017 | 0.017 | 0.018 | 0.017 | 0.017 | 0.019 | 0.018 | 0.017 | 0.018 | 0.021 | 0.020 | 0.023 | 0.020 | 0.004 | 0.004 |
| 9           | 0.173       | 0.173 | 0.165 | 0.190 | 0.158 | 0.171 | 0.166 | 0.159 | 0.012 | 0.014 | 0.014 | 0.014 | 0.012 | 0.018 | 0.015 | 0.014 | 0.019 | 0.022 | 0.020 | 0.027 | 0.000 | 0.000 | 0.000 |
| 10          | 0.174       | 0.177 | 0.171 | 0.183 | 0.164 | 0.179 | 0.159 | 0.155 | 0.070 | 0.014 | 0.014 | 0.014 | 0.005 | 0.018 | 0.016 | 0.016 | 0.019 | 0.022 | 0.020 | 0.025 | 0.000 | 0.000 | 0.000 |
| 11          | 0.209       | 0.209 | 0.171 | 0.207 | 0.194 | 0.190 | 0.170 | 0.171 | 0.106 | 0.018 | 0.006 | 0.015 | 0.015 | 0.020 | 0.017 | 0.016 | 0.020 | 0.022 | 0.022 | 0.028 | 0.000 | 0.000 | 0.000 |
| 12          | 0.194       | 0.194 | 0.176 | 0.198 | 0.191 | 0.187 | 0.170 | 0.161 | 0.108 | 0.106 | 0.019 | 0.014 | 0.014 | 0.019 | 0.017 | 0.015 | 0.019 | 0.021 | 0.020 | 0.027 | 0.000 | 0.000 | 0.000 |
| 13          | 0.180       | 0.180 | 0.176 | 0.189 | 0.167 | 0.184 | 0.160 | 0.154 | 0.076 | 0.016 | 0.116 | 0.110 | 0.014 | 0.019 | 0.016 | 0.016 | 0.019 | 0.022 | 0.020 | 0.025 | 0.031 | 0.007 | 0.007 |
| 14          | 0.178       | 0.196 | 0.192 | 0.194 | 0.177 | 0.196 | 0.193 | 0.166 | 0.159 | 0.169 | 0.191 | 0.179 | 0.168 | 0.019 | 0.020 | 0.020 | 0.021 | 0.021 | 0.020 | 0.026 | 0.023 | 0.004 | 0.004 |
| 15          | 0.193       | 0.208 | 0.195 | 0.200 | 0.187 | 0.194 | 0.200 | 0.162 | 0.126 | 0.132 | 0.145 | 0.143 | 0.133 | 0.192 | 0.016 | 0.016 | 0.019 | 0.020 | 0.022 | 0.027 | 0.000 | 0.000 | 0.000 |
| 16          | 0.190       | 0.193 | 0.186 | 0.206 | 0.199 | 0.194 | 0.178 | 0.158 | 0.107 | 0.128 | 0.131 | 0.114 | 0.126 | 0.197 | 0.130 | 0.018 | 0.021 | 0.020 | 0.020 | 0.027 | 0.007 | 0.007 | 0.003 |
| 17          | 0.196       | 0.204 | 0.182 | 0.184 | 0.191 | 0.174 | 0.183 | 0.164 | 0.168 | 0.184 | 0.182 | 0.180 | 0.183 | 0.202 | 0.171 | 0.172 | 0.022 | 0.020 | 0.025 | 0.007 | 0.007 | 0.007 | 0.003 |
| 18          | 0.201       | 0.210 | 0.211 | 0.181 | 0.197 | 0.175 | 0.214 | 0.198 | 0.224 | 0.209 | 0.216 | 0.206 | 0.212 | 0.203 | 0.187 | 0.217 | 0.217 | 0.022 | 0.022 | 0.025 | 0.032 | 0.007 | 0.007 |
| 19          | 0.215       | 0.211 | 0.188 | 0.186 | 0.183 | 0.193 | 0.189 | 0.200 | 0.190 | 0.183 | 0.208 | 0.199 | 0.188 | 0.198 | 0.234 | 0.188 | 0.189 | 0.208 | 0.023 | –     | –     | –     | –     |
| 20          | 0.286       | 0.310 | 0.290 | 0.255 | 0.285 | 0.272 | 0.278 | 0.256 | 0.306 | 0.286 | 0.316 | 0.302 | 0.283 | 0.278 | 0.303 | 0.317 | 0.279 | 0.295 | 0.257 | –     | –     | –     | –     |

1–20 indicate groups of *Simocephalus*: 1, *Simocephalus* cf. *vetulus* from China and Taiwan; 2, *S. vetulus* from Europe; 3, *Simocephalus* cf. *vetulus* from Europe; 4, *S. vetuloides* from China; 5, *S. beianensis* from China; 6, *S. sp.* from North America; 7, *S. cf. punctatus* from North America; 8, *S. cf. mixtus* from North America; 9, *S. himalayensis* from China; 10, *S. cf. congener* from Europe; 11, *S. congener* from Europe; 12, *S. himalayensis microdus* from China; 13, *S. exspinosus* from Europe; 14, *S. cf. exspinosus* from Europe; 15, *S. sibiricus* from China; 16, *S. sp.* = *S. serrulatus* from Taiwan in Young et al. 2012; 17, *S. heilongjiangensis* from China and Taiwan; 18, *S. serrulatus* from North America, China and Europe; 19, *Daphnia* cf. *similoides* from China (outgroup); 20, *Diaphanosoma dubium* from Taiwan (outgroup).  
 Intra-group and inter-group genetic distances of the 20 groups involved 132 nucleotide sequences. The standard deviations (SD) are shown in the upper diagonal of the matrix and the right column. Analyses were conducted using the Kimura 2-parameter model.  
 doi:10.1371/journal.pone.0112808.t003

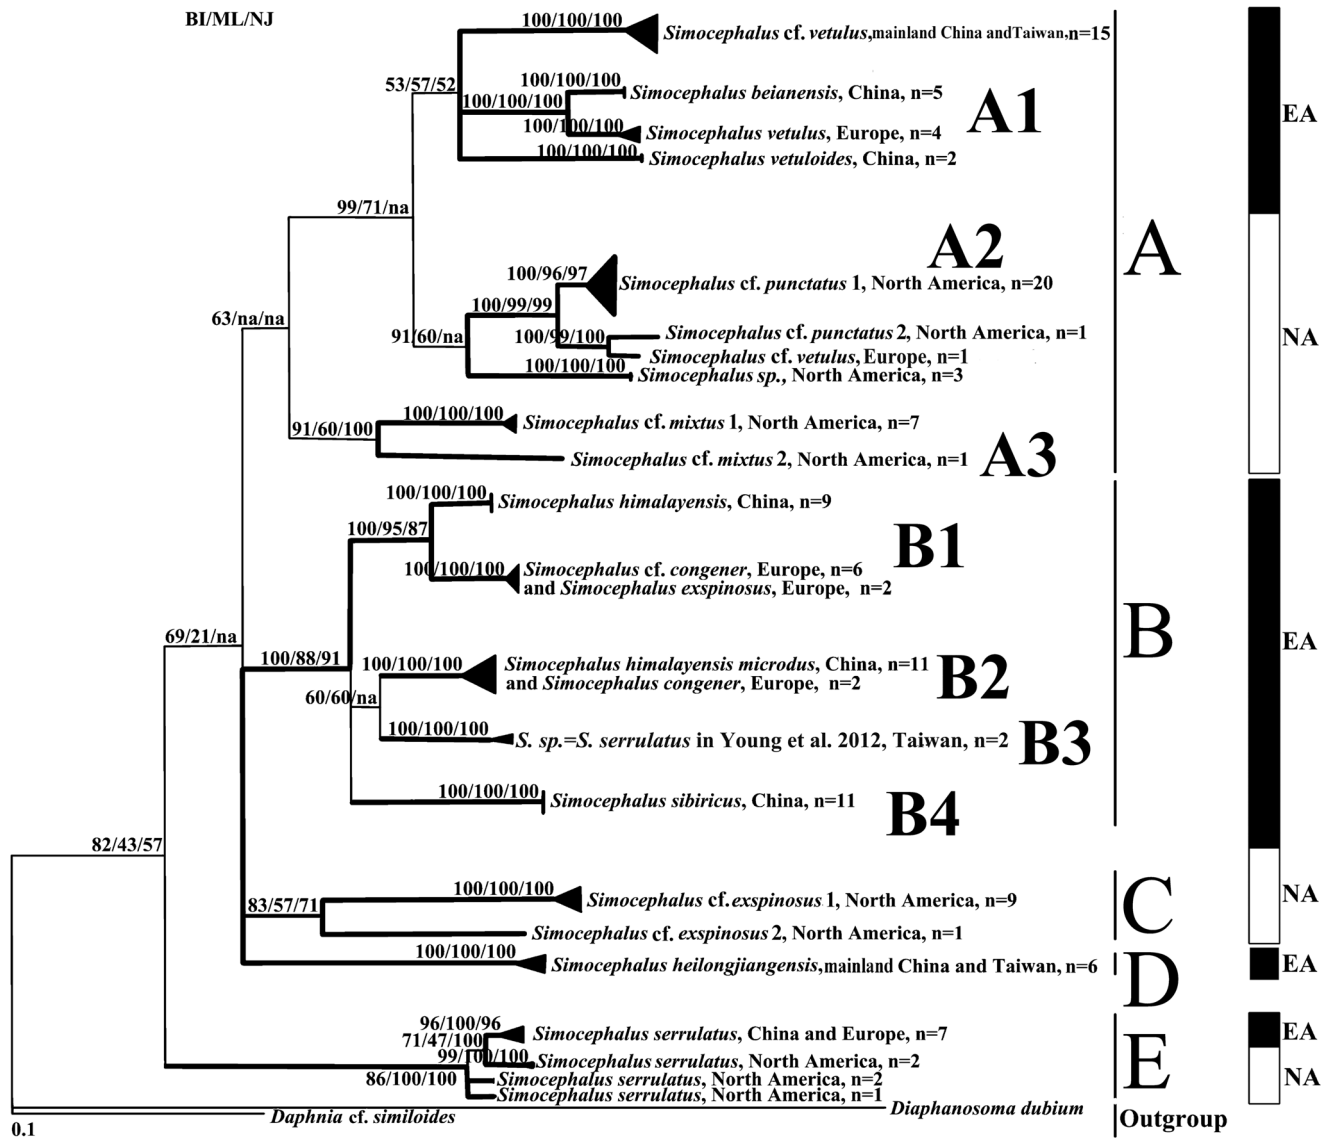

**Figure 1. The phylogeny of *Simocephalus* inferred from mitochondria cytochrome *c* oxidase subunit I (COI) sequences as a consensus tree formed from trees constructed using Bayesian inference (BI), maximum likelihood (ML), and neighbor-joining (NJ) methods.** Numbers at nodes are as follows: BI posterior probability value multiplied by 100 for legibility, followed by bootstrap values between 0 and 1 from ML and NJ analyses. The scale bar corresponds to 0.1 substitutions per nucleotide position. In the left column, EA indicates Eurasian, and NA indicates North American. A, B, C, D, and E indicate the five subgenera. A: *Simocephalus s. str.*; B and C: *Simocephalus (Echinocaudus)*; D: *Simocephalus (Aquipiculus)*; and E: *Simocephalus (Coronocephalus)*. doi:10.1371/journal.pone.0112808.g001

1976-bp 18S fragment were used for phylogenetic reconstructions. Neighbor-joining (NJ) analyses used the Kimura 2-parameter model with 1,000 bootstraps. Maximum likelihood (ML) analysis which used the GTR+G+I evolutionary model indicated by Modeltest version 3.7 [34], was performed with PhyML V2.4.4 [35] and bootstrap resampled 1,000 times. MrBayes version 3.1.2 [36], [37] was used to generate Bayesian inferences (BI). The program was run for two million generations and sampled every 100 generations, and the first 25% of all of the trees sampled before convergence was discarded as burn-in. The 50% majority rule consensus tree was generated from the remaining trees, and the posterior probability of each node was calculated as the percentage of the trees that recovered the particular node.

## Results

### COI

There were 130 sequences in the alignment of COI sequences. The nucleotide frequencies are 24.0% (A), 38.8% (T/U), 16.5% (C), and 20.7% (G). There are 403 conserved sites, 255 variable sites, and 245 parsimony-informative sites. The overall transition/transversion bias, R, is 1.24. The genetic distances are represented in Table 3.

The NJ, ML, and BI phylogenetic analyses led to highly congruent tree topologies (Fig. 1). In all of the trees, the terminal branches represent 100% support for presumed biological species of *Simocephalus*. Sometimes such biological species are undistinguishable if morphological identification is used (see for example *Simocephalus congener* and *S. cf. congener* in Europe, Fig. 1A)

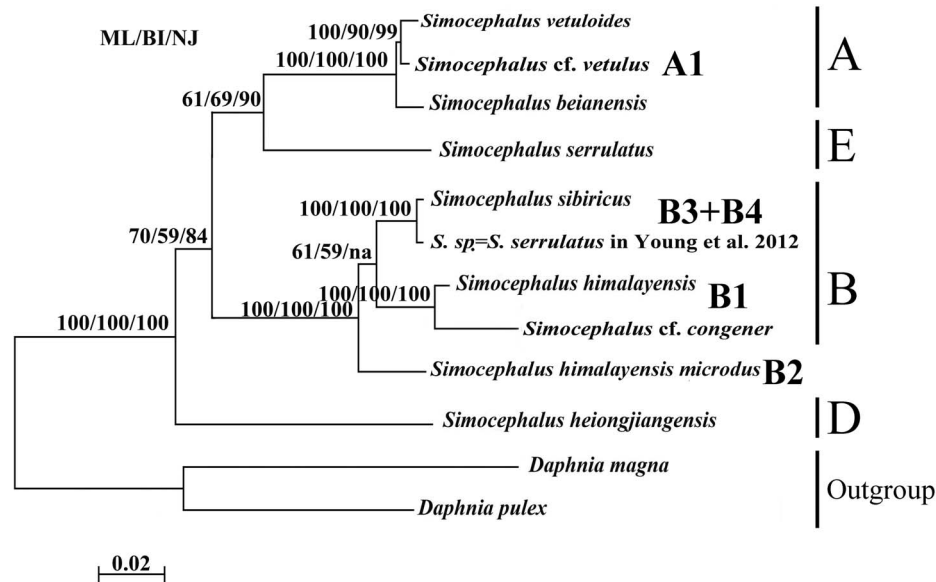

**Figure 2. Phylogeny of *Simocephalus* inferred from 18S sequences as a consensus tree formed from trees constructed using maximum likelihood (ML), Bayesian inference (BI), and neighbor-joining (NJ) methods.** ML bootstrap values between 0 and 1, followed by BI posterior probability value multiplied by 100 for legibility and bootstrap values between 0 and 1 from NJ analyses. The scale bar corresponds to 0.02 substitutions per nucleotide position. A indicates *Simocephalus* (*Echinocaudus*), B *Simocephalus* s. str., D *Simocephalus* (*Aquipiculus*), and E *Simocephalus* (*Coronocephalus*). doi:10.1371/journal.pone.0112808.g002

Their number is not fully clear, as indicated by clades A2 and E, for example. Although the statistical support for the deep branches is low, the grouping of the deeper clades generally agrees with the intra-generic classification of Orlova-Bienkowskaja [9], namely for *Simocephalus* (*Echinocaudus*), *S. (Coronocephalus)*, *Simocephalus* s. str., and *S. (Aquipiculus)*.

Clade A represents *Simocephalus* s. str., and it contains two subclades, A1 (*S. cf. vetulus* from mainland China and Taiwan, *S. beianensis* and *S. vetuloides* from China, and *S. vetulus* from Europe) and A2 from North America (*S. cf. punctatus* 1 and 2, *S. cf. vetulus* and 2 *Simocephalus sp.*, KC617180 and KC617418). Subclades A1+ A2 are grouped with subclade A3 (*S. cf. mixtus* 1 and 2 from North America), but this has very low support. *Simocephalus* s. str. (clade A) is resolved as the sister group to *Simocephalus* (*Echinocaudus*) (clades B+C) and *S. (Aquipiculus)* (clade D), but support was also very low.

Clade B is the Eurasian portion of *Simocephalus* (*Echinocaudus*). It contains sub-clade B1 (*S. cf. congener* and *S. exspinosus* from Europe, most likely a single taxon, and *S. himalayensis*) and has high posterior probability and high bootstrap support (BI/ML/NJ, 100/95/87). The other clade, B2, contains *S. congener* from Europe and *S. himalayensis microdus* (as a subspecies whose separate status is questionable). Clade B3 consists of “*S. serrulatus*” from Taiwan. The fourth clade (B4) contains only *S. sibiricus*. It is important that all of the Eurasian taxa of *S. (Echinocaudus)* form a monophyletic group that is well-supported (BI/ML/NJ, 100/88/91, respectively) by different statistical analyses.

Clade C, the American portion of *Simocephalus* (*Echinocaudus*), contains two taxa, *S. cf. exspinosus* 1 and 2 from North America, with moderate support.

In this analysis, clade D, *S. (Aquipiculus)*, contains only a single taxon, *S. heiongiangensis*.

Clade E, *S. (Coronocephalus)*, contains various clades of *S. serrulatus* from North America and Eurasia, and the number of

taxa in this complex is unclear. *S. (Coronocephalus)* is resolved as basal to other species of *Simocephalus* that are distant one from another, but support for this position is relatively weak.

The genetic distances between groups which were formed by the sequences were calculated (Table 3). The intra-group genetic distance of *Simocephalus* varies from 0.070 to 0.224, and the inter-group genetic distance of *Simocephalus* is not exceeding 0.008. The greatest genetic distance is between *S. himalayensis* and *S. serrulatus*, while the smallest is between *Simocephalus cf. congener* and *S. himalayensis* (7.0%).

## 18S

Ten sequences of 18S were obtained, the nucleotide frequencies are 21.5% (A), 38.8% (T/U), 24.5% (C), and 30.3% (G). There are 1604 conserved sites and 345 variable sites, of which 212 are parsimony-informative. The overall transition/transversion bias, R, is 0.75.

The tree (Fig. 2) contains four well-supported clades (A, B, E, D) that correspond to the subgenera identified by Orlova-Bienkowskaja [9]. As in the case of COI, “*S. serrulatus*” from Young et al. [25] appears within the *S. (Echinocaudus)* subgenus, which confirms the misclassification of this specimen. *Simocephalus* s.str. (clade A, abbreviations as in the COI tree) is represented only by the subclade A1. It is a sister group of *S. (Coronocephalus)* (clade E), and the clade containing these two subgenera is a sister group to *S. (Echinocaudus)* (clade B) which contains clades B1, B2 and B3+B4, corresponding to the clades from the COI tree. *S. (Aquipiculus)* (clade D) is the basal-most taxon of the genus *Simocephalus* in this analysis with strong statistical support for this position. No representative of clade D from the COI tree is present in this tree. See the genetic distances in Table 4.

The position of clade E differs between the 18S and COI trees. In both cases statistical support of its grouping with other branches is moderate or definitively insufficient for a final verdict. Therefore

**Table 4.** The genetic distances (Dxy) between each pair of species of genus *Simocephalus* involved 12 nucleotide sequences include outgroups are shown based on the 18S gene.

|    | 1     | 2     | 3     | 4     | 5     | 6     | 7     | 8     | 9     | 10    | 11    | 12    |
|----|-------|-------|-------|-------|-------|-------|-------|-------|-------|-------|-------|-------|
| 1  |       | 0.003 | 0.002 | 0.005 | 0.005 | 0.005 | 0.005 | 0.004 | 0.005 | 0.004 | 0.006 | 0.006 |
| 2  | 0.007 |       | 0.003 | 0.005 | 0.005 | 0.005 | 0.005 | 0.005 | 0.005 | 0.005 | 0.006 | 0.007 |
| 3  | 0.008 | 0.012 |       | 0.004 | 0.005 | 0.005 | 0.005 | 0.005 | 0.005 | 0.004 | 0.006 | 0.006 |
| 4s | 0.046 | 0.050 | 0.043 |       | 0.003 | 0.003 | 0.003 | 0.003 | 0.005 | 0.005 | 0.007 | 0.007 |
| 5  | 0.047 | 0.051 | 0.045 | 0.006 |       | 0.003 | 0.004 | 0.004 | 0.005 | 0.006 | 0.007 | 0.006 |
| 6  | 0.047 | 0.051 | 0.046 | 0.019 | 0.018 |       | 0.003 | 0.003 | 0.005 | 0.005 | 0.007 | 0.006 |
| 7  | 0.049 | 0.052 | 0.047 | 0.020 | 0.022 | 0.023 |       | 0.002 | 0.005 | 0.005 | 0.007 | 0.007 |
| 8  | 0.043 | 0.049 | 0.043 | 0.015 | 0.017 | 0.018 | 0.007 |       | 0.005 | 0.005 | 0.007 | 0.007 |
| 9  | 0.044 | 0.050 | 0.044 | 0.061 | 0.060 | 0.061 | 0.063 | 0.057 |       | 0.005 | 0.006 | 0.006 |
| 10 | 0.032 | 0.038 | 0.036 | 0.054 | 0.056 | 0.057 | 0.056 | 0.050 | 0.055 |       | 0.006 | 0.006 |
| 11 | 0.080 | 0.085 | 0.082 | 0.087 | 0.087 | 0.089 | 0.093 | 0.088 | 0.089 | 0.084 |       | 0.005 |
| 12 | 0.076 | 0.082 | 0.076 | 0.070 | 0.079 | 0.082 | 0.084 | 0.078 | 0.086 | 0.082 | 0.052 |       |

1-12 indicate: 1, *Simocephalus* cf. *vetulus*; 2, *S. vetuloides*; 3, *S. betanensis*; 4, *S. himalayensis*; 5, *S. cf. congener*; 6, *S. himalayensis microdus*; 7, *S. sibiricus*; 8, *S. sp. = S. serrulatus* in Young et al. 2012; 9, *S. heilongjiangensis*; 10, *S. serrulatus*; 11, *Daphnia magna*; 12, *D. pulex*. The standard deviations (SD) are shown in the upper diagonal. Analyses were conducted using the Kimura 2-parameter model. doi:10.1371/journal.pone.0112808.t004

we need additional studies (using other genes?) for understanding the exact position of *S. (Coronocephalus)* in the genus.

## Discussion

Our study confirms the opinion [1] that a real diversity of the cladocerans is several times higher than is accepted now, owing to the existence of many cryptic species complexes instead of “traditional” taxa. Our study also supported the concept of “continental endemism” [6], [38]. In the case of *Simocephalus*, only the populations of *S. serrulatus* from Europe and North America seem to be closely related; there are no other species shared between the two continents. We propose that the differentiation of some clades, such as the Eurasian and North American sections of *S. (Echinocaudus)*, most likely each took place within the continent to which they are now largely confined.

In the case of *Simocephalus*, the COI barcoding approach was very effective for the discrimination of cryptic species. This might be explained by the age of the genus which is known since the Mesozoic [39], [40]. Each subgenus of *Simocephalus* has recent taxa on different continents (except Antarctica), which could be regarded as confirmation of an ancient, possibly Mesozoic, differentiation between subgenera that occurred before the continental break up, similarly to the subgenera of *Daphnia* [40]. We believe that the continental endemism of *Simocephalus* taxa is also mainly explained by their old age. At the same time, we also found some cases of later, inter-continental, differentiation, see above.

According to the rule-of-thumb of the barcoding approach [41], two clades are considered as distinct species if the divergence between them in COI sequences is greater than 3% while lower (0.7–2.2%) values suggest recent divergence of a clade. Of course, these values seem to vary in different groups of the Daphniidae; the mutation rate is much faster in halophilic cladocerans, for example [41], [42]. However, all of the terminal branches revealed by the 3% criterion are potentially separate species, which are thereby quite numerous in China.

In many cases, appropriately naming such taxa is impossible. Due to greater, recent activity by molecular phylogeneticists in North America [23], [24], [31], the continent is simply better studied. In contrast, type localities of the majority of the “non-Chinese” species are located in Europe (*S. vetulus*, *S. congener*, *S. exspinosus*, and *S. serrulatus*) or Eastern Siberia (*S. mixtus*, *S. vetuloides*, and *S. sibiricus*). These regions have not been adequately studied genetically except in the preliminary work of Kohout et al. [29] in Central Europe.

Orlova-Bienkowskaja [9] proposed to differentiate the five subgenera within the genus *Simocephalus* based on the shape of the frontal part of the head, rostrum shape, ocellus shape, length of the postero-dorsal valve prominence, expression of the pre-anal angle, anal teeth on postabdomen and presence of basal or distal pecten of spines on the postabdominal claw. In our study, the COI and 18S trees support this classification. As usual, the statistical support for the deeper branches of the COI tree is insufficient to draw any conclusions [23].

The characters used by Orlova-Bienkowskaja [9] for species discrimination are less successful as noted earlier by Hann [43]. Some characters seem to be too variable and originate many times in different clades, such as:

- 1) Ocellus shape. This character was found to be very variable even in a single population of *S. vetulus* [44]. A minute ocellus appears several times in the evolution of the genus, see Fig. 1, clade A2.

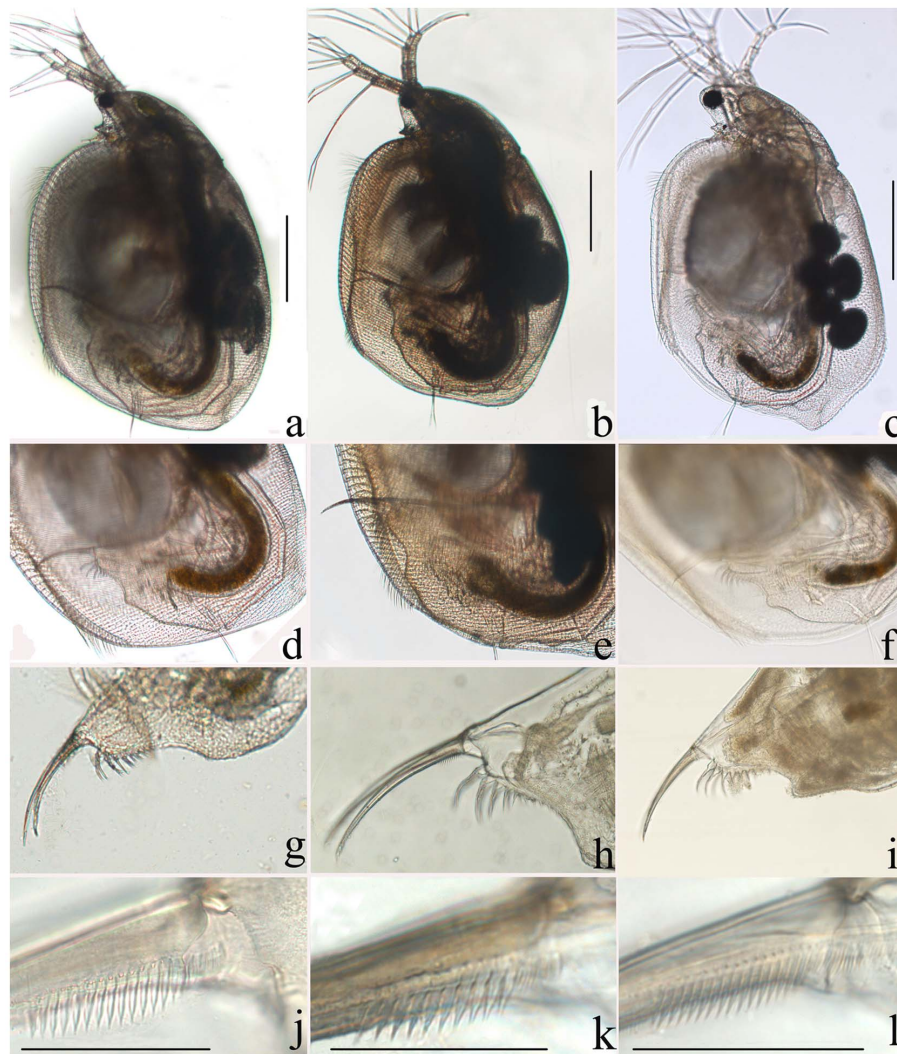

**Figure 3. Photographs of living parthenogenetic females of the three morphologically-similar species from China: *S. himalayensis microdus* (a, d, g, j), *S. himalayensis* (b, e, h, k), and *S. sibiricus* (c, f, i, l). General view (a–c). General view of the postabdomen (d–f). Distal portion of the postabdomen (g–i). Pecten of spines on the postabdominal claw (j–k). Scale bars: 0.5 mm (a–i); 0.01 mm (j–l). doi:10.1371/journal.pone.0112808.g003**

**Table 5. Main differences among five species of *Simocephalus* (*Echinocaudus*).**

| Species                                    | <i>S. cf. congener in our sample from Norway</i>   | <i>S. exspinosus</i>                                              | <i>S. sibiricus</i>                                           | <i>S. himalayensis</i>   | <i>S. himalayensis microdus</i> |
|--------------------------------------------|----------------------------------------------------|-------------------------------------------------------------------|---------------------------------------------------------------|--------------------------|---------------------------------|
| Maximum body length                        | 1.62±0.13                                          | 2.15±0.27                                                         | 1.73±0.17                                                     | 3.10±0.10                | 2.64±0.23                       |
| Postero-dorsal valve, shape and prominence | Rounded, absent                                    | Small or absent                                                   | Small, obvious                                                | Small                    | Small                           |
| Ocellus                                    | Short rhomboid                                     | Point-like                                                        | Short rhomboid                                                | Point-like               | Round or rhomboid               |
| Anal teeth                                 | 7–10                                               | 12–22                                                             | 10–16                                                         | 12–14                    | 11–19                           |
| Basal pecten of spines                     | 17–20                                              | 8–12                                                              | 16–22                                                         | 12–15                    | 8–21                            |
| Posterior valve margin                     | Dorsal posterior valve margin with small denticles | The dorso and ventral posterior valve margin with small denticles | Dorsal posterior valve margin with thick and strong denticles | Smooth, without denticle | Smooth, without denticle        |
| Posterior anal angle                       | Pointed and protruding                             | Not obviously protruding                                          | Pointed and protruding                                        | Not protruding           | Not protruding                  |
| References                                 | This work                                          | Shi et al. [18]                                                   | Shi et al. [18]                                               | Shi et al. [18]          | Shi et al. [18]                 |

doi:10.1371/journal.pone.0112808.t005



- 2) Shape of the postero-dorsal valve prominence. Earlier, Young et al. [25] showed that *S. vetulus*, *S. mixtus* and *S. vetuloides*-like morphotypes from Taiwan belong to a single species, and the size of the postero-dorsal prominence is too variable to be used in the taxonomy of, at least, this clade. In our tree, there are two clades conforming to the diagnosis of *S. cf. vetulus* in clade A1. Therefore, the shape of the postero-dorsal prominence does not work well for species determination.
- 3) Size and number of spines in the basal pecten on the postabdominal claw. According to the species determination scheme of Orlova-Bienkowskaja [9] the main differences between *S. exspinosus* and *S. congener* concern the anal teeth and the basal pecten of the spines on the postabdominal claw. *Simocephalus exspinosus* has 12 to 22 teeth while *Simocephalus congener* bears 9 to 18 teeth, according to Orlova-Bienkowskaja [9] and 7 to 9 in our material. The former has 8 to 12 moderately-sized postabdominal spines while the latter has 20 to 25 fine spines or 18 according to Orlova-Bienkowskaja [9] and 17 to 20 in our material from Norway. Earlier, Hann [43], based both on morphology and the electrophoretic analysis of allozymes, proposed that there are “*S. exspinosus*” and “*S. congener*” hybrids in Canada. In addition, the spectra of variability seem to overlap. Therefore, the significance of the size and number of the spines in the basal pecten must be regarded as unknown to date. In our tree, *S. exspinosus* and *S. cf. congener* from Europe look to belong to a single taxon (clade B1) in contrast to other, morphologically similar, forms, such as *S. himalayensis microdus* from China, *S. congener* from Europe (clade B2), and others. There are even two *congener*-like taxa in Europe, clades B1 and B2.

Orlova-Bienkowskaja [9] proposed that *S. sibiricus* and *S. himalayensis* are junior synonyms of *S. exspinosus*. In contrast, Chen et al. [14] and Shi et al. [18] found some differences among *S. himalayensis*, *S. himalayensis microdus*, and *S. exspinosus*. Table 5 summarizes the differences between the taxa of the *Simocephalus (Echinocaudus)* subgenus in China based on information from Chinese sources (see also Fig. 3). Unfortunately, most of these “differences” are very dubious and appear to have

been proposed despite insufficient information on the variability in such characters throughout the whole Eurasian range. Characters such as presence-absence of small teeth on the anal embayment and the expression of the preanal angle of the postabdomen seem to be more promising (Fig. 3), but variability in the former and the latter must be studied. We believe that male characters could be more important for taxonomy, but they have not yet been adequately described.

## Conclusion

Our study unambiguously confirmed the existence of both local and widely distributed lineages from the subgenera of *S. (Echinocaudus)* and *Simocephalus* s.str. in China. To date, their determination based on morphological characters is difficult. But it is a consequence of their inadequate study instead of morphology “lacking resolution” [41]. Morphology of different cladoceran taxa needs to be reexamined by taking a wider range of characters into consideration (e.g., of female thoracic limbs and of adult males). However, keeping in mind that many species were previously described using European populations as the type specimen, a new revision of the European taxa that combines molecular and morphological methods is also urgently needed.

## Acknowledgments

This study was supported in part by the National Natural Science Foundation of China (Grant Nos. 31071880 and 31272262), the Zhejiang Provincial Natural Science Foundation and Zhejiang Key Scientific & Technological Innovation Team Project (Grant Nos. 2010R50039-20), the Hangzhou Key Laboratory for Animal Adaptation and Evolution (Grant No. 20100333T05) and the Russian Foundation for Basic Research (grants 12-04-00207-a and 14-04-01149-a). We also thank the two anonymous reviewers for their valuable comments.

## Author Contributions

Conceived and designed the experiments: XH XS FG. Performed the experiments: XH. Analyzed the data: XH. Contributed reagents/materials/analysis tools: XS FG. Contributed to the writing of the manuscript: XH AAK.

## References

1. Forró L, Korovchinsky NM, Kotov AA, Petrussek A (2008) Global diversity of cladocerans (Cladocera; Crustacea) in freshwater. *Hydrobiologia* 595: 177–184.
2. Dumont HJ, Negrea SV (2002) Introduction to the class Branchiopoda. In: Dumont, H. J., Guides to the identification of the microinvertebrates of the continental waters of the world 19. Backhuys Publishers, Leiden, 398 p.
3. Frey DG (1982) Questions concerning cosmopolitanism in Cladocera. *Arch Hydrobiol* 93: 484–502.
4. Frey DG (1987) The taxonomy and biogeography of the Cladocera. *Hydrobiologia* 145: 5–17.
5. Taylor DJ, Finston TL, Hebert PDN (1998) Biogeography of a widespread freshwater crustacean: Pseudocongruence and cryptic endemism in the North American *Daphnia laevis* complex. *Evolution* 52: 1648–1670.
6. Xu S, Hebert PDN, Kotov AA, Cristescu ME (2009) The noncosmopolitanism paradigm of freshwater zooplankton: insights from the global phylogeography of the predatory Cladoceran *Polyphemus pediculus* (Linnaeus, 1761) (Crustacea, Onychopoda). *Mol Ecol* 18: 5161–5179.
7. Frey DG (1993) Species of *Pleuroxus* (Anomopoda, Chydoridae) from the subantarctic islands and southernmost South America: a partial unravelling of the *Pleuroxus aduncus* problem. *Hydrobiologia* 262: 145–188.
8. Smirnov NN (1996) Cladocera: the Chydorinae and Sycyinae (Chydoridae) of the world. Guides to the identification of the microinvertebrates of the Continental Waters of the world. SPB Academic Publishing, Amsterdam 11: 1–197.
9. Orlova-Bienkowskaja MY (2001) Cladocera, Anomopoda: Daphniidae, genus *Simocephalus*. Leiden: Backhuys. 1–130.
10. Nogueira PFM, Melao MDA, Lombardi A, Vieira AA (2005) The effects of *Anabaena spiroides* (Cyanophyceae) exopolysaccharide on copper toxicity to *Simocephalus serrulatus* (Cladocera: Daphniidae). *Freshwater Biol* 50: 1560–1567.
11. Martínez-Jerónimo F, Cruz-Cisneros JL, García-Hernández L (2008) A comparison of the response of *Simocephalus mixtus* (Cladocera) and *Daphnia magna* to contaminated freshwater sediments. *Ecotox Environ Safe* 71: 26–31.
12. Chiang XZ, Chen SZ (1974) Crustacean in the Everest Area in China. In: Scientific survey reports on biology and Alpine physiology in the Everest Area in China. Editor: Tibet scientific expedition team of Chinese Academy of Sciences, Beijing: Science Press. 127–136. (In Chinese).
13. Chiang XZ, Du NS (1979) Fauna Sinica. Freshwater Cladocera. Beijing: Science Press. 124–130. (In Chinese).
14. Chen SZ, Shi XL, Shi XB (1992) Description of a new subspecies of *Simocephalus himalayensis* Chiang et Chen, 1974 (Crustacea: Diplostraca). *J Harbin Norm Univ (Nat Sci)* 8: 91–95. (In Chinese).
15. Shi XL, Shi XB (1994) On two new species and two new records of *Simocephalus* from China (Crustacea: Diplostraca: Daphniidae). *Acta Zootax Sin* 19: 403–411. (In Chinese).
16. Shi XL, Shi XB (1996) On the species and distribution of *Simocephalus* in Heilongjiang province, China (Branchiopoda: Diplostraca). *Acta Zootax Sin* 21: 263–276. (In Chinese).
17. Xu YQ, Chen YS, Lin G, Rao XZ (2002) A new subspecies of *Simocephalus latirostris*. *J Fujian Teachers Univ (Nat Sci)* 18: 66–68. (In Chinese).
18. Shi XL, Xu S, Xue CC, Huang XN, Liu GJ (2011) Discovery of males of *Simocephalus himalayensis* (Crustacea: Cladocera: *Simocephalus*): with the re-description of females. *Chin J Oceanol Limnol* 29: 206–212.
19. Adamowicz SJ, Petrussek A, Colbourne JK, Hebert PDN, Witt JDS (2009) The scale of divergence: a phylogenetic appraisal of intercontinental allopatric

- speciation in a passively dispersed freshwater zooplankton genus. *Mol Phylogenet Evol* 50: 423–436.
20. Sacherová V, Hebert PDN (2003) The evolutionary history of the Chydoridae (Crustacea:Cladocera). *Biol J Linn Soc* 79: 629–643.
  21. Belyaeva M, Taylor DJ (2009) Cryptic species within the *Chydorus sphaericus* species complex (Crustacea: Cladocera) revealed by molecular markers and sexual stage morphology. *Mol Phylogenet Evol* 50: 534–546.
  22. Bekker EI, Kotov AA, Taylor DJ (2012) A revision of the subgenus *Eurycercus* (*Eurycercus*) Baird, 1843 emend. nov. (Cladocera: Eurycercidae) in the Holarctic with the description of a new species from Alaska. *Zootaxa* 3206: 1–40.
  23. Elías-Gutiérrez M, Martínez Jerónimo F, Ivanova NV, Valdez MM, Hebert PDN (2008) DNA barcodes for Cladocera and Copepoda from Mexico and Guatemala, highlights and new discoveries. *Zootaxa* 1839: 1–42.
  24. Jeffery NW, Elías-Gutiérrez M, Adamowicz SJ (2011) Species diversity and phylogeographical affinities of the Branchiopoda (Crustacea) of Churchill, Manitoba, Canada. *PLoS One* 6: e 18364.
  25. Young SS, Ni MH, Liu MY (2012) Systematic study of the *Simocephalus* sensu stricto species group (Cladocera: Daphniidae) from Taiwan by morphometric and molecular analyses. *Zool Stud* 51: 222–231.
  26. Yi Z, Song W, Gong J, Warren A, Al-Rasheid K, et al. (2009) Phylogeny of six oligohymenophoreans (Protozoa, Ciliophora) inferred from small subunit rRNA gene sequences. *Zool Scr* 38: 323–331.
  27. Folmer O, Black M, Hoch W, Lutz R, Vrijenhoek R (1994) DNA primers for amplification of mitochondrial cytochrome c oxidase subunit I from diverse metazoan invertebrates. *Mol Mar Biol Biotech* 3: 294–299.
  28. Medlin L, Elwood HJ, Stickel S, Sogin ML (1988) The characterization of enzymatically amplified eukaryotic 16S-like rRNA-coding regions. *Gene* 71: 491–499.
  29. Kohout J, Illyová M, Čiampor F, Čiamporová-Zaovičová Z (2014) Discrimination between four *Simocephalus* species from Slovakia using a PCR-RFLP technique. *Biologia* 69: 76–79.
  30. Costa FO, DeWaard JR, Boutillier J, Ratnasingham S, Dooh RT, et al. (2007) Biological identifications through DNA barcodes: the case of the Crustacea. *Can J Fish Aquat Sci* 64: 272–295.
  31. Prosser S, Martínez-Arce A, Elías-Gutiérrez M (2013) A new set of primers for COI amplification from freshwater microcrustaceans. *Mol Ecol Resour* 13: 1151–1155.
  32. Thompson JD, Higgins DG, Gibson TJ (1994) CLUSTAL W: improving the sensitivity of progressive multiple sequence alignment through sequence weighting, positions-specific gap penalties and weight matrix choice. *Nucl Acids Res* 22: 4673–4680.
  33. Tamura K, Peterson D, Peterson N, Stecher G, Nei M, et al. (2011) MEGA5: molecular evolutionary genetics analysis using maximum likelihood, evolutionary distance, and maximum parsimony methods. *Mol Biol Evol* 28: 2731–2739.
  34. Posada D, Crandall KA (1998) Modeltest: testing the model of DNA substitution. *Bioinformatics* 14: 817–818.
  35. Guindon S, Gascuel O (2003) A simple, fast and accurate algorithm to estimate large phylogenies by maximum likelihood. *Syst Biol* 52: 696–704.
  36. Huelsenbeck JP, Bollback JP (2001) Empirical and hierarchical Bayesian estimation of ancestral states. *Syst Biol* 50: 351–366.
  37. Ronquist F, Huelsenbeck JP (2003) MrBayes 3: Bayesian phylogenetic inference under mixed models. *Bioinformatics* 19: 1572–1574.
  38. Penton EH, Hebert PDN, Crease TJ (2004) Mitochondrial DNA variation in North American populations of *Daphnia obtusa*: continentalism or cryptic endemism? *Mol Ecol* 13: 97–107.
  39. Fryer G (1991) A daphnid ephippium (Branchiopoda: Anomopoda) of Cretaceous age. *Zool J Linn Soc* 102: 163–167.
  40. Kotov AA, Taylor DJ (2011) Mesozoic fossils (>145 Mya) suggest the antiquity of the subgenera of *Daphnia* and their coevolution with chaoborid predators. *BMC Evol Biol* 11: 129.
  41. Hebert PDN, Cywinska A, Ball SL, deWaard JR (2003) Biological identifications through DNA barcodes. *P R Soc London* 270: 313–321.
  42. Connelly SJ, Taylor DJ (2009) Accelerated mtDNA evolution in microcrustaceans (Daphniidae) that lack an ultraviolet-radiation refugium. *Integr Comp Biol* 49 Suppl 1: E35–E35.
  43. Hann BJ (2003) Cladocera: Anomopoda Daphniidae: genus *Simocephalus*, by Marina Y. Orlova-Bienkowskaja. *J Paleolimnol* 29: 135.
  44. Jermakov NW (1924) On the ocellus changes in *Simocephalus vetulus* under influence of darkness and starvation. *Rab Volzhsk Biol St* 7: 151–173. (In Russian).
